# Supplementary material for: Effectiveness and Safety of Electroacupuncture for Depression: A Systematic Review and Meta-Analysis
Source: Hindawi journal article supplement (doi:10.1155/2022/4414113), 2022-08-18
Supplement: f1 [file 4414113.f1.zip]

Study %

ID WMD (95% CI) Weight

Qu\_2013 -7.10 (-10.86, -3.34) 49.59

Lin\_2012 0.83 (-2.66, 4.32) 50.41

Overall (I-squared = 89.1%, p = 0.002) -3.10 (-10.87, 4.67) 100.00

NOTE: Weights are from random effects analysis

-10.9 0 10.9
