# Supplementary figures and images for: Effectiveness and Safety of Electroacupuncture for Depression: A Systematic Review and Meta-Analysis
Source: Hindawi journal article supplement (doi:10.1155/2022/4414113), 2022-08-18

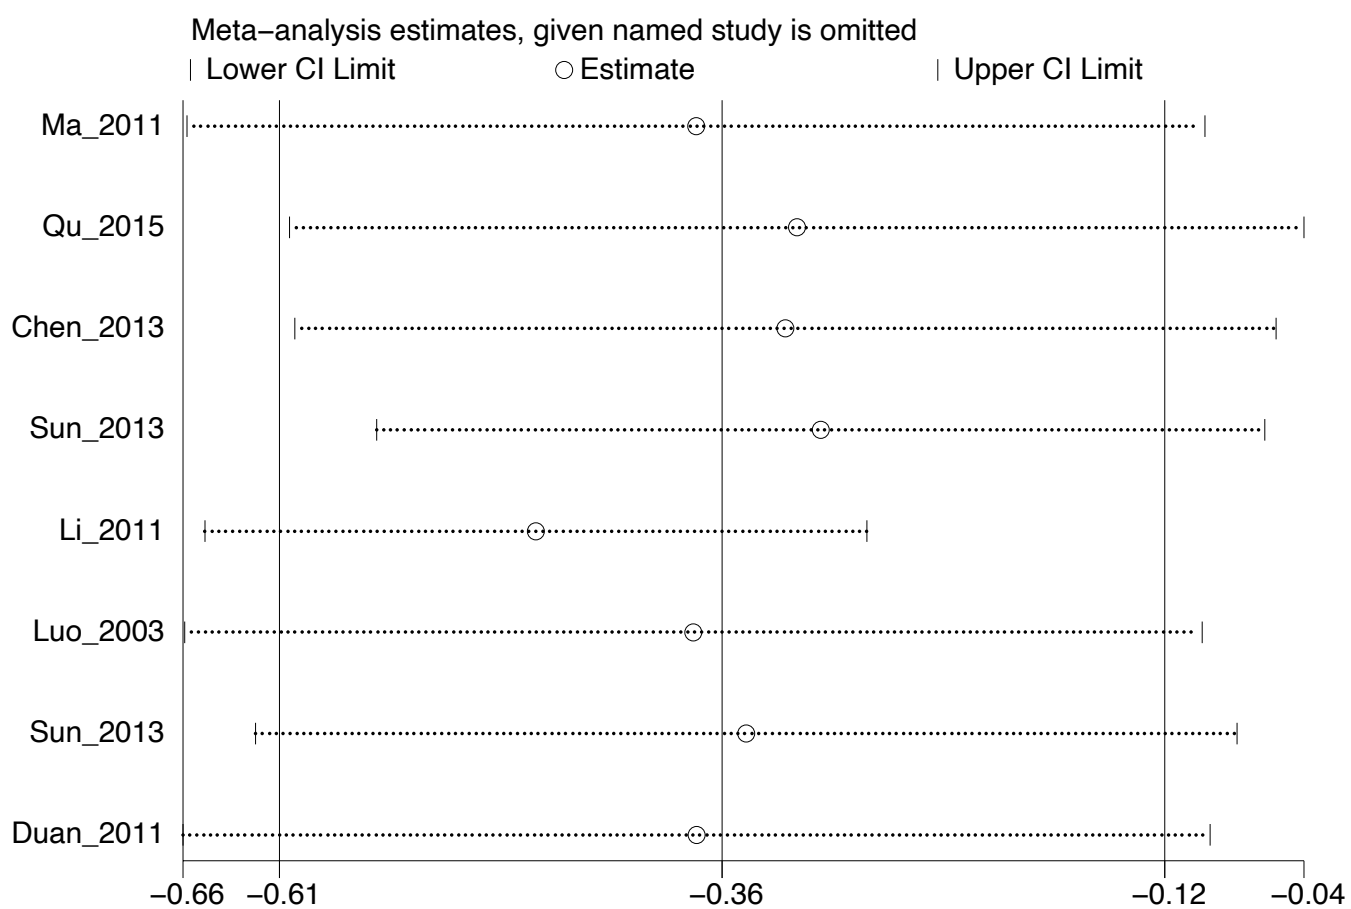

Supplement: f1 [file 4414113.f1.zip]

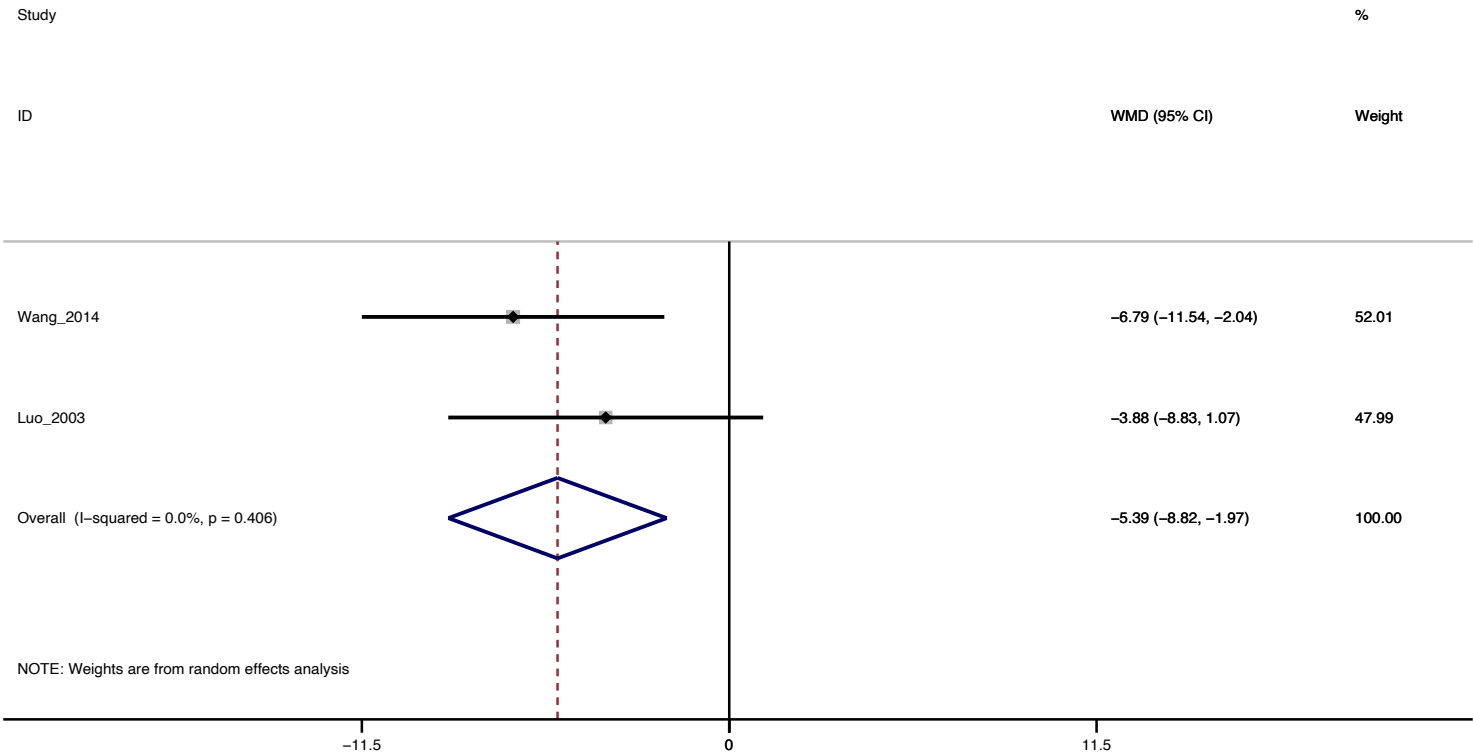

Supplement: f1 [file 4414113.f1.zip]
